# Supplementary material
Source: PubMed Central journal article supplement (PMC4511095)
Supplement: NIHMS707657-supplement-Supplemental_data.pdf [file NIHMS707657-supplement-Supplemental_data.pdf]

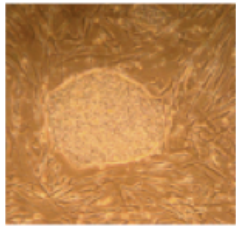

**hESCs**

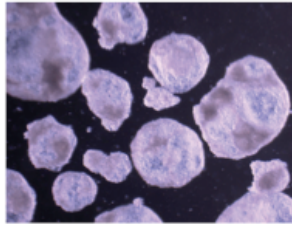

**embryoid bodies**

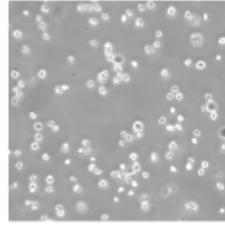

**dissociated EBs**

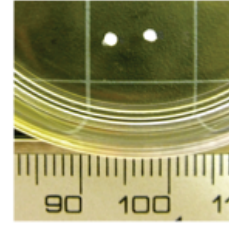

**pellets**

| 1 expansion                                                                                                 | 2 induction                                                                                                                                                                                                                           |                                                                                                                                                                                                                                                                                                                                                                                             |     | 3 Pellet formation |    |    |    |    |    |
|-------------------------------------------------------------------------------------------------------------|---------------------------------------------------------------------------------------------------------------------------------------------------------------------------------------------------------------------------------------|---------------------------------------------------------------------------------------------------------------------------------------------------------------------------------------------------------------------------------------------------------------------------------------------------------------------------------------------------------------------------------------------|-----|--------------------|----|----|----|----|----|
| <p><b>Expand hESCs for down stream experiment</b></p> <p><b>Consistent source of hESCs (passage 30)</b></p> | EB1                                                                                                                                                                                                                                   | EB2                                                                                                                                                                                                                                                                                                                                                                                         | EB3 | P1                 | P2 | P3 | P4 | P5 | P6 |
|                                                                                                             | <p>Recapitulate the differentiation of ESCs into a variety of cell types <i>in vitro</i></p> <p>Study synergistic effects of morphogenetic factors and hypoxia on differentiation of hESCs toward precursor cells of chondrocytes</p> | <p><b>Cartilage tissue development</b></p> <p>Three-dimensional pellet culture to recapitulate</p> <ul style="list-style-type: none"> <li>condensation of precartilaginous mesenchyme,</li> <li>commitment to the chondrogenic lineage and</li> <li>differentiation into chondroblasts and eventually into chondrocytes.</li> </ul> <p>Kawakami, Y et. al. (2006) Curr. Opin. Cell Biol</p> |     |                    |    |    |    |    |    |

**Supplemental Figure 1.** The overview of study hESCs line H9 were expanded from p.28 to p.30 and kept in liquid N<sub>2</sub> as stock until use. Embryoid bodies were induced using hypoxia and secreted soluble factors from primary chondrocytes. After 3 weeks of induction, EBs were dissociated into single cells and formed chondrogenic pellets for 6 weeks.

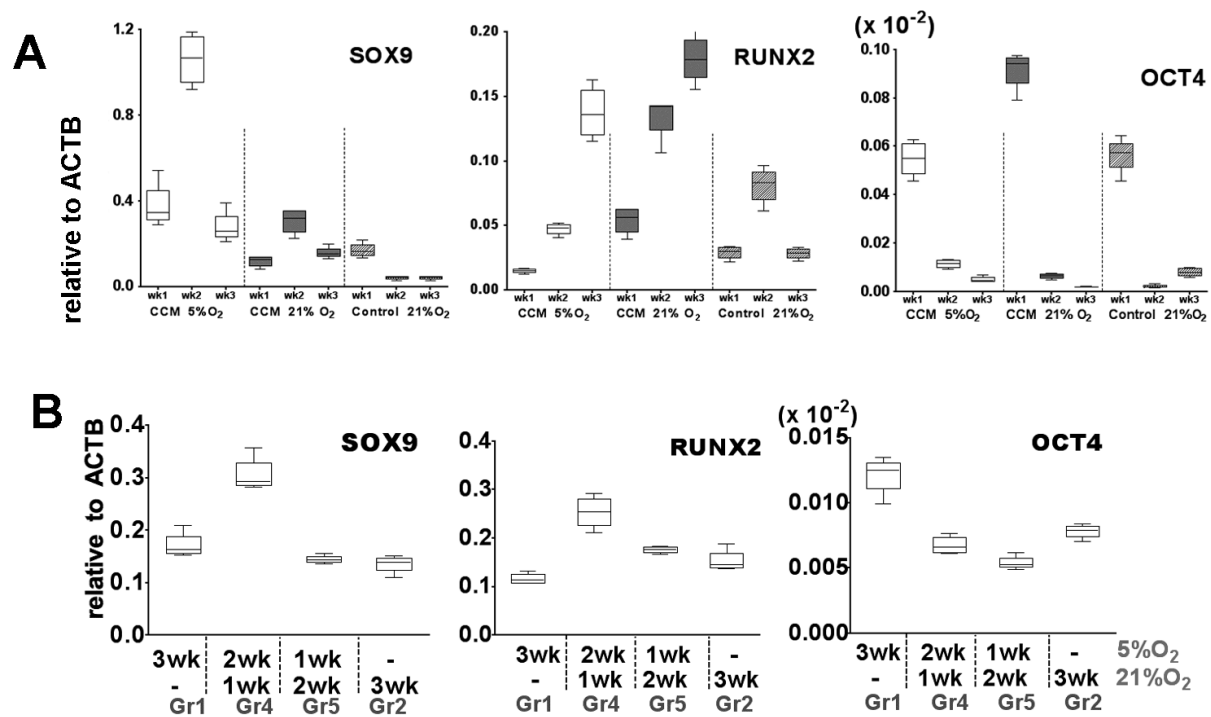

**Supplemental Figure 2. Gene expression in EBs cultured in conditioned medium (CCM) under hypoxic conditions.** Results are presented as a boxplot. The boundary of the box closet to zero indicates 25<sup>th</sup> percentile, a line within the box marks the median, and the boundary of the box farthest from zero indicate 75<sup>th</sup> percentile. **(A)** Real-time PCR showed expression profiles of transcription factors and extracellular matrix over 3 weeks time course of EB induction (study 1). **(B)** EBs were cultured in CCM with different exposure periods of 5% O<sub>2</sub> for 3 weeks (study 2). Gene expression levels were normalized with *ACTB*.
